# Supplementary material for: Microarray analysis of lung long non-coding RNAs in cigarette smoke-exposed mouse model
Source: PubMed Central journal article supplement (PMC5777800; doi:10.18632/oncotarget.23362), 2017-12-18
Supplement: oncotarget-08-115647-s001.pdf [file oncotarget-08-115647-s001.pdf]

## Microarray analysis of lung long non-coding RNAs in cigarette smoke-exposed mouse model

### SUPPLEMENTARY MATERIALS

Supplementary Table 1: The primer sequences in this study

| LncRNA Name        | Forward primers (5'-3')   | Reverse primers (5'-3')  |
|--------------------|---------------------------|--------------------------|
| uc011wph.1         | CCGAGCCCAGGACTAAGAAA      | ACTTCAGTTTCCTGTTCTTTCCA  |
| AK076311           | ACAGGACATCACTACACCCACG    | GGAAGCCATACAAGCAAGAAGA   |
| ENSMUST00000176356 | TGGTAGTGCTGACAGCAACTGG    | GCCAATGGTCACAGTCTGCTTA   |
| uc008tgd.1         | GAATGGTGGCAGTGGAATGT      | TCATCCACATTTGCGACCC      |
| uc007coi.2         | CATCCGAAC TACATCTGTTGAGC' | AGCCGTGAAGACCACAGAAAC    |
| ENSMUST00000152414 | GGCTGCCGTACAAAGTTCT       | ACTGGGGATTCAACTCACG      |
| ENSMUST00000155715 | TGAGTGAGGTGGGAAATCG       | CTAGACATGGGTGGGGAAA      |
| ENSMUST00000181247 | GTGGAGTGACTTGTCTGAAATC    | CAAATTCCTCCAGGACTTACGA   |
| GAPDH(MOUSE)       | CACTGAGCAAGAGAGGCCCTAT    | GCAGCGAACTTTATTGATGGTATT |
